# Supplementary material
Source: MDPI journal article supplement (https://www.mdpi.com/2072-6694/13/11/2842)
Supplement: s1 [file s1]

Archive with 3 entries (3 files):
- cancers-1211279 Supplementary Materials and Methods.pdf
- Full Western Blot image.zip
- cancers 1211279_supplementary figure.pdf
